# Supplementary material
Source: MDPI journal article supplement (https://www.mdpi.com/2073-4441/16/5/736)
Supplement: s1 [file s1]

Archive with 6 entries (6 files):
- Table S1.pdf
- Table S2.pdf
- Table S3.pdf
- Table S5.xlsx
- Table S6.xlsx
- Table S7.pdf
