# Supplementary material
Source: MDPI journal article supplement (https://www.mdpi.com/2073-4441/16/5/736)
Supplement: s1 [file s1 › Table S5.xlsx]

## Sheet: Sheet1
Table S5. The abundance of macrobenthos at each station in the tidal flats of Garolim Bay.
	S1	S2	S3	S4	S5	S6	S7	S8	S9	S10	S11	S12	S13	S14	S15	S16	S17	S18	S19	S20	S21	S22	S23	S24	S25	S26	S27	S28	S29	S30	S31	S32	S33	S34	S35	S36	S37	S38	S39	S40	S41	S42	S43	S44	S45	S46	S47	S48	S49
Abludomelita sp.	22			22	7				7						7								15	52	15			15	15		22
Allorchestes sp.																															7
Alpheus bisincisus																																			7				7
Alpheus japonicus																									15
Alpheus sp.																																					7
Ampharete sp.																																											22
Ampithoe sp.																															15				15								7
Angustassiminea castanea							22
Arcotheres sinensis																																												22
Arcuatula senhousia			7																										422		22
Aricidea sp.	7	7						15			22			89			22	15	44			44	7		7	37	7				7			22	15					15				7		15	44		7
Batillaria cumingii				15																								67			44												30
Bullacta caurina	15				7							30											7		7	7		7																	7
Capitella capitata																																	15	7
Ceratonereis mirabilis																															30												7
Circulus duplicatus																												7
Cirolana sp.																		7										37			44
Cirratulus cirratus	30	7			7										7												22		7
Clymenella koreana																																														7			15
Decorifer insignis										67
Diastylis sp.				7					44	7																																	7
Dimorphostylis sp.		7		15																7			7						59	7		7												7		59
Dosinia japonica										15											15									7						7
Eteone longa										15							15	30							7		7		15	15	7						15					7
Euchone alicaudata					15
Eumida sanguinea						7
Exolaternula spengleri	7							15				7												163													7
Felaniella sowerbyi		30		118																																								30		15	7
Gammarus sp.	7																																														22
Glycera chirori	7		15		22										22								15			15				7		7				7							7	15			7	22
Glycera decipiens															7
Goniada japonica	81	52	15		96				7			15		7					15			37	30	7	96	37		7	7	15	15							7					15		7
Grandifoxus sp.																																											7			22
Harmothoe forcipata															22																			7			7		7
Haustorioides sp.																												7		15							7											59
Hediste japonica																							7
Helicana wuana																		7
Hemigrapsus penicillatus				22	7				7				22					30										22			37		7										7
Heteromastus filiformis	44	488	1354	829	947	207	925	52	710	7	1251	7	7	30	363	7	30	170	155	747	170	311	89	15	289	466	200	429	215	636	141	15	15	59	185	7	104	59	59	992	81	59	400	52	577	266	407	22	59
Hima fratercula hiradoensis				7	15				7	15			7								7															7									7
Ilyoplax pingi					22		104	7			15	200	7		148		7	89		30	7		30	15					185	44	7	104		7			52	96	7	44			15				7
Ischnochiton comptus	7																																																7
Kuwaita heteropoda	7																																							7							15
Lagis bocki	7																																					15
Laguncula pulchella		7																											15				7
Laonice cirrata															30																															15
Laonice sp.								7						7	7
Laqueidae unid.						15
Laternula anatina							7			7				7
Laternula boschasina																											7											44	7
Laternula gracilis																		22											178			81	7
Lepidozona coreanica																															7
Leptochela sydniensis												7
Leptochelia sp.																																											7
Leptoplanidae																																											7
Lottia kogamogai				118																								15			44
lridona iridescens																			15	7																						7			7
Lumbrineris japonica	30	22	30	7	52		81		15						7					74	15	15	22		15	96		44	15	22								22		37			37	7	7	15	22
Lumbrineris sp.		15
Lunella correensis																												22			89
Macrophthalmus (Mareotis) japonicus		15		52	22		81	22		30	22			7			52	7	44			22	7				15			15					44	30	44	15	37		30	67	7		15
Maera sp.					7
Magelona japonica												7
Maldane cristata			7
Mediomastus californiensis		96	37	141	96	30	52	7	74		229				44		7	30		200	15	207	22		37	52	59	67	22	170	59				96	7	30	7	67	244	15	15	67	30	96	37	133	7	37
Megalopa																						22						7
Metharpinia sp.																							15
Microclymene propecaudata		44	30		7														7			37										7
Moerella hilaris								7													7	15			7		7													15		7
Monocorophium sp.	7														7		7															15	799														67
Mysidacea unid.		7										15
Nassarius livescens	7																									7	7
Nematoda unid.		30																											30															15		22		7
Nemertea unid.	22		52	15		22						7	15					37		7		7	15	7	15	7	52	15	15		44				15	15	7				7	22		7			15		7
Nephtys caeca				7					15		7
Nephtys polybranchia		67	81		15		15		222	7	7	22			7				15		15	215	15		104	52	15			274					52	15				37				15	52	15	7		44
Nereis longior							7							7
Nitidotellina lischkei																																				15
Niveotectura pallida																												15			67
Orchomene sp.																																														7
Oxydromus sp.																																																	104
Paralacydonia paradoxa					7
Paraleonnates uschakovi								30
Paranthuridae unid.					7
Paraprionospio pinnata											7									7
Patelloida conulus																												30			37
Perinereis aibuhitensis				7	15																																		22
Perinereis cultrifera																															37
Perinereis nuntia																								7				37	22
Philyra kanekoi									7
Phyllodoce koreana						7
Polydora sp.											7	7							7								30																	30
Potamocorbula sp																													37
Praxillella pacifica											15	7																		7
Prionospio japonica										7					7								7																										22
Protankyra bidentata		15
Pseudoleucon sp.		7		7																								15																	7
Pseudopolydora paucibranchiata					7														7																					7									7
Ruditapes philippinarum	15	222	7	237	15	30	59	22											7			15	7			15		96	118		44				7					22	7	7	22	15		7	15	7
Schistomeringos matsushimaensis																																																	7
Scoletoma nipponica							7
Scoloplos armiger	15																			7	7	7	7		15	37																				30
Sigambra hanaokai							7																			7				15										7		7	7			15
Sinonovacula constricta																	15												7
Spio borealis	7														30					7			7				15	7
Spiophanes bombyx											7
Sternaspis scutata	7
Striarca symmetrica														7
Synchelidium sp.		7							15													7			7																					15	7
Tambalagamia fauveli														7
Tharyx sp.															7												15																						15
Theora lata	7																									7
Travisia sp.																																												89
Tubuca arcuata													7
Typosyllis variegata						22																									7													22					7
Umbonium thomasi																																												525
Urothoe sp.																																																	7
Zoea																				7						7
