# Supplementary material
Source: MDPI journal article supplement (https://www.mdpi.com/2073-4441/16/5/736)
Supplement: s1 [file s1 › Table S6.xlsx]

## Sheet: Sheet1
Table S6. The biomass of macrobenthos at each station in the tidal flats of Garolim Bay.
	S1	S2	S3	S4	S5	S6	S7	S8	S9	S10	S11	S12	S13	S14	S15	S16	S17	S18	S19	S20	S21	S22	S23	S24	S25	S26	S27	S28	S29	S30	S31	S32	S33	S34	S35	S36	S37	S38	S39	S40	S41	S42	S43	S44	S45	S46	S47	S48	S49
Abludomelita sp.	0.01			0.01	0.04				0.01						0.01								0.01	0.26	0.01			0.01	0.02		0.01
Allorchestes sp.																												0.15			0.3
Alpheus bisincisus																															0.01
Alpheus japonicus																																			0.93				0.5
Alpheus sp.																									4.66
Ampharete sp.																																					1.59
Ampithoe sp.																																											0.07
Angustassiminea castanea																															0.01				0.01								0.01
Arcotheres sinensis						0.07
Arcuatula senhousia							0.07																			0.07				0.07										0.07		0.07	0.07			0.07
Aricidea sp.							0.15
Batillaria cumingii	0.07	0.07						0.07			0.07			0.07			0.07	0.07	0.14			0.07	0.07		0.07	0.07	0.07				0.07			0.07	0.07					0.07				0.07		0.07	0.07		0.07
Bullacta caurina				8.58																								37.15			29.97												18.28
Capitella capitata	0.3				0.89							12.65											9.77		11.47	6.22		0.3																	3.33
Ceratonereis mirabilis																																	0.07	0.07
Circulus duplicatus																															0.22												0.07
Cirolana sp.																		0.01										0.01			0.02
Cirratulus cirratus	0.44	0.15			0.07										0.15												0.22		0.07
Clymenella koreana																																														0.07			0.07
Decorifer insignis				0.01					0.01	0.01																																	0.01
Diastylis sp.		0.01		0.01																0.01			0.01						0.01	0.01		0.01												0.01		0.01
Dimorphostylis sp.																																																	0.07
Dosinia japonica										20.79											48.62									17.61						0.15
Eteone longa										0.07							0.07	0.15							0.07		0.07		0.07	0.15	0.07						0.07					0.07
Euchone alicaudata					0.22
Eumida sanguinea						0.07
Exolaternula spengleri		0.07		0.15																																								0.22		0.22	0.15
Felaniella sowerbyi	0.01																																														0.01
Gammarus sp.	0.3		0.67		1.48										1.41								0.89			0.67				0.3		0.15				0.96							0.52	0.67			0.37	0.89
Glycera chirori															0.22
Glycera decipiens	0.81	0.67	0.07		1.41				0.07			0.07		0.07					0.15			0.22	0.15	0.15	1.11	0.59		0.15	0.07	0.22	0.15							0.15					0.22		0.07
Goniada japonica																																											0.01			0.01
Grandifoxus sp.															0.07																			0.07			0.07		0.07
Harmothoe forcipata																												0.01		0.01							0.01											0.01
Haustorioides sp.																		24.86
Hediste japonica				0.27	0.16				0.36				0.47					13.24										0.39			4.74		8.77										12.22
Helicana wuana	0.07	0.6	1.7	0.96	1.41	0.25	0.74	0.07	0.89	0.07	1.63	0.07	0.07	0.07	0.44	0.07	0.07	0.22	0.15	1.11	0.15	0.37	0.07	0.07	0.3	0.37	0.22	0.67	0.22	0.81	0.15	0.07	0.07	0.08	0.15	0.07	0.15	0.07	0.07	1.19	0.15	0.07	0.44	0.07	0.67	0.15	0.3	0.07	0.2
Hemigrapsus penicillatus				0.15	3.33				0.44	4.96			2.52								2.37															2.74									1.18
Heteromastus filiformis					2.18		7.01	0.01			0.54	5.13	0.07		2.06		0.07	1.78		2.27	0.44		0.36	0.1					6.13	4.82	1.24	1.6		0.01			0.93	0.69	0.43	2.25			1.68				0.1
Hima fratercula hiradoensis	0.22																																																0.07
Ilyoplax pingi	0.22																																					0.3
Ischnochiton comptus															0.15																															0.07
Kuwaita heteropoda								0.07						0.07	0.07
Lagis bocki						0.22
Laguncula pulchella							0.3			0.07				0.96
Laonice cirrata																											0.07											1.11	0.15
Laonice sp.																		0.3											10.73			2	0.07
Laqueidae unid.	0.07							0.15				0.15												0.52													0.07
Laternula anatina																															0.15
Laternula boschasina												0.07
Laternula gracilis																																											0.01
Lepidozona coreanica																																											0.37
Leptochela sydniensis				0.67																								0.81			0.67
Leptochelia sp.	2.59																																							1.63							3.03
Leptoplanidae	1.18	0.81	0.89	0.15	0.67		2.66		1.11						0.44					2.22	0.81	0.44	1.18		0.15	2.74		1.85	0.59	0.67								0.81		1.78			1.41	0.59	0.44	0.74	0.59
Lottia kogamogai						0.02
lridona iridescens		0.07
Lumbrineris japonica		0.15																											0.07				0.07
Lumbrineris sp.		1.15		8.01	2.48		40.03	12.08		3.26	3.79			15.61			31.66	9.52	14.59			4.52	0.74				5.34			5.14					37.36	9.08	7.41	0.75	17.65		13.39	9.6	7.64		0.27
Lunella correensis					0.05
Macrophthalmus (Mareotis) japonicus												0.07
Maera sp.			0.07
Magelona japonica		0.15	0.07	0.15	0.15	0.07	0.15	0.07	0.15		0.22				0.07		0.07	0.07		0.22	0.07	0.15	0.07		0.07	0.07	0.07	0.15	0.07	0.22	0.15				0.15	0.07	0.07	0.07	0.07	0.3	0.07	0.07	0.15	0.07	0.07	0.07	0.22	0.07	0.07
Maldane cristata																						0.01						0.01
Mediomastus californiensis																							0.01
Megalopa		0.07	0.07		0.07														0.07			0.07										0.07
Metharpinia sp.																			1.04	0.07																						0.3			1.04
Microclymene propecaudata								2													3.55	0.07			2.15		0.37													0.67		0.07
Moerella hilaris	0.01														0.01		0.01															0.01	0.79														0.02
Monocorophium sp.			0.07																										21.31		0.59
Mysidacea unid.		0.01										0.03
Nassarius livescens																							0.22
Nematoda unid.		0.07																											0.07															0.07		0.07		0.07
Nemertea unid.	0.15		0.15	0.07		0.07						0.07	0.07					0.22		0.07		0.07	0.07	0.07	0.07	0.07	0.3	0.15	0.15		0.22				0.07	0.09	0.07				0.07	0.15		0.07			0.07		0.07
Nephtys caeca				0.15					0.22		0.15
Nephtys polybranchia		1.11	1.18		0.37		0.59		2.74	0.15	0.22	0.37			0.22				0.3		0.3	1.63	0.22		0.67	0.3	0.15			2					0.74	0.22				0.3				0.3	1.55	0.15	0.22		1.26
Nereis longior							0.15							0.07
Nitidotellina lischkei	4.22																									3.48	4.29
Niveotectura pallida																																				0.22
Orchomene sp.																																														0.01
Oxydromus sp.					0.07
Paralacydonia paradoxa					0.01
Paraleonnates uschakovi																												3.55			2.89
Paranthuridae unid.				0.44	0.96																																		0.37
Paraprionospio pinnata																															0.81
Patelloida conulus																								2.44				1.48	0.81
Perinereis aibuhitensis								1.41
Perinereis cultrifera									1.04
Perinereis nuntia																																												0.01
Philyra kanekoi											0.07	0.07							0.07								0.15																	0.07
Phyllodoce koreana																																																	0.22
Polydora sp.																													0.81
Potamocorbula sp											0.07	0.07																		0.07
Praxillella pacifica										0.07					0.07								0.07																										0.07
Prionospio japonica											0.07									0.07
Protankyra bidentata		41.96
Pseudoleucon sp.		0.01		0.01																								0.01																	0.01
Pseudopolydora paucibranchiata					0.07														0.07																					0.07									0.07
Ruditapes philippinarum																												0.07
Schistomeringos matsushimaensis										0.22
Scoletoma nipponica																												24.86
Scoloplos armiger	1.92	19.46	0.37	0.52	0.96	1.11	0.8	0.15											0.15			0.22	4.66			1.78		0.3	2.44		0.3				0.15					0.3	0.07	0.07	0.89	2.29		0.15	0.3	0.52
Sigambra hanaokai	0.07																			0.07	0.07	0.15	0.07		0.15	0.22																				0.22
Sinonovacula constricta																	1.33												0.67
Spio borealis	0.07														0.15					0.07			0.07				0.07	0.07
Spiophanes bombyx											0.07
Sternaspis scutata	0.07
Striarca symmetrica														15.54
Synchelidium sp.		0.01							0.01													0.01			0.01																					0.01	0.01
Tambalagamia fauveli														0.07
Tharyx sp.															0.15												0.22																						0.15
Theora lata	0.07																									0.15
Travisia sp.																																												0.59
Tubuca arcuata																												11.1			69.63
Typosyllis variegata						0.3																									0.07													0.15					0.07
Umbonium thomasi													3.12
Urothoe sp.																																												88.58
Zoea																																																	0.01
